# Supplementary material for: Near-Infrared Transitions from the Singlet Excited States to the Ground Triplet State of the S2 Molecule
Source: MDPI journal article supplement (doi:10.3390/physchem3010009), 2023-02-10
Supplement: s1 [file s1]

**Table S1.** *The vertical excitation energies with the  $X^3\Sigma_g^-$  state for other states ( $\text{cm}^{-1}$ ) in  $R_{s-s}=1.899\text{\AA}$*

| Basis         | $a^1\Delta_g$ | $b^1\Sigma_g^+$ | $1^3\Pi_g$     | $1^1\Pi_g$     |
|---------------|---------------|-----------------|----------------|----------------|
| aug-cc-pwCVTZ | 4490.50       | 7700.96         | 38445.10       | 45534.13       |
| aug-cc-pwCVQZ | 4391.58       | 7552.95         | 38514.41       | 45429.61       |
| aug-cc-pwCV5Z | 4364.48       | 7511.62         | 38577.06       | 45458.34       |
| CBS 345       | 4345.30       | 7481.78         | 38653.84       | 45521.28       |
| CBS45         | 4342.48       | 7478.06         | 38627.93       | 45481.67       |
| best CBS      | 4343.89±1.41  | 7479.92±1.86    | 38640.88±12.96 | 45501.47±19.81 |

best CBS =  $X \pm (\text{CBS45} - X)$

$X = (\text{CBS45} + \text{CBS 345}) / 2$

**Table S2.**Calculated spin-orbit matrix elements in  $S_2(R_{s-s}=1.899\text{\AA})$ 

| Basis                            | Spin-orbit matrix elements with the<br>$X^3\Sigma_g^-$ state for other states( $\text{cm}^{-1}$ ) |             |              | Spin-orbit matrix elements with<br>the $1^3\Pi_g$ state for other<br>states( $\text{cm}^{-1}$ ) |                 |
|----------------------------------|---------------------------------------------------------------------------------------------------|-------------|--------------|-------------------------------------------------------------------------------------------------|-----------------|
|                                  | $b^1\Sigma_g^+$                                                                                   | $1^1\Pi_g$  | $1^3\Pi_g$   | $a^1\Delta_g$                                                                                   | $b^1\Sigma_g^+$ |
| basis A                          | 382.8                                                                                             | 192.7       | -193.2       | -189.9                                                                                          | 177.4           |
| basis B                          | 384.6                                                                                             | 193.2       | -193.8       | -190.6                                                                                          | 178.1           |
| basis C                          | 385.7                                                                                             | 193.4       | -194.1       | -190.9                                                                                          | 178.3           |
| basis A <sub>2</sub>             | 426.53                                                                                            | 215.4       | -216.8       | 212.6                                                                                           | 201.2           |
| basis A <sub>1</sub>             | 426.62                                                                                            | 214.9       | -216.5       | -212.1                                                                                          | 200.5           |
| basis B <sub>1</sub>             | 427.94                                                                                            | 215.3       | -217.0       | -212.6                                                                                          | 201.1           |
| basis C <sub>1</sub>             | 428.90                                                                                            | 215.6       | -217.2       | -212.7                                                                                          | 201.3           |
| CBS 345                          | 430.02                                                                                            | 215.95      | -217.39      | -212.74                                                                                         | 201.47          |
| CBS34                            | 428.70                                                                                            | 215.53      | -217.29      | -212.89                                                                                         | 201.45          |
| CBS45                            | 429.68                                                                                            | 215.84      | -217.36      | -212.78                                                                                         | 201.46          |
| best CBS                         | 429.85±0.17                                                                                       | 215.90±0.06 | -217.38±0.01 | -212.76±0.02                                                                                    | 201.47±0.00     |
| basis D <sup>[19, 38]</sup>      | 422.5                                                                                             | 200.3       | -203.1       |                                                                                                 |                 |
| basis D1 (core2) <sup>[19]</sup> | 423.0                                                                                             | 202.7       | -204.0       |                                                                                                 |                 |
| basis E <sup>[19]</sup>          | 410.3                                                                                             | 200.9       | -200.8       |                                                                                                 |                 |
| basis F <sup>[19]</sup>          | 416.6                                                                                             | 203.9       | -204.9       |                                                                                                 |                 |
| basis G (core2) <sup>[20]</sup>  |                                                                                                   |             |              | -200.2                                                                                          | 188.6           |

basis D is the double-zeta set for sulfur given

basis D1: on the basis of the basis D, correlating the  $2s^22p^63s^23p^4$  electrons of S atom to account for the CV effect of the  $S_2$ .

basis E contains additional s and p bond functions [exponents  $\alpha(s) = 1.0$  and  $\alpha(p) = 0.6$  relative to basis D

basis F adds only an s bond function to basis D.

basis G consists of the double-zeta (12s, 9p) set for sulfur contracted to [6s, 4p] with s and p bond functions (exponents  $\alpha(s) = 1.0$  and  $\alpha(p) = 0.6$ ).

Table S3.The error analysis for the Einstein coefficient  $A$  of the  $b-X_{Ms=0}$  transition.

|                                      | <i>Values</i>            | <i>Errors</i>             |
|--------------------------------------|--------------------------|---------------------------|
| $\Delta E_{b-X(0,0)}/\text{cm}^{-1}$ | 7641 $\text{cm}^{-1}$    | 1.86 $\text{cm}^{-1}$     |
| $C_{b,X}$                            | 0.057467                 | 0.000037i                 |
| $A/\text{s}^{-1}$                    | 0.403824 $\text{s}^{-1}$ | 0.0003218 $\text{s}^{-1}$ |

Table S4. The theoretically inferred energy, Einstein coefficient and oscillator strength of the experimentally observable  $b$ - $X_{Ms=\pm 1}$  band

| $v'-v''$ | $E(cm^{-1})$ | $A(s^{-1})$ | $f(a.u.)$  |
|----------|--------------|-------------|------------|
| 0-0      | 7640.75      | 0.403824    | 1.0413E-08 |
| 0-1      | 6936.95      | 0.302197    | 9.4536E-09 |
| 1-0      | 8281.40      | 0.514157    | 1.1286E-08 |
| 1-1      | 7577.60      | 0.393894    | 1.0327E-08 |
| 2-0      | 8925.67      | 0.643733    | 1.2164E-08 |
| 2-1      | 8221.86      | 0.503147    | 1.1205E-08 |
| 2-2      | 7523.10      | 0.385455    | 1.0252E-08 |
| 3-0      | 9560.64      | 0.791124    | 1.3029E-08 |
| 3-1      | 8856.84      | 0.628956    | 1.2070E-08 |
| 3-2      | 8158.07      | 0.491526    | 1.1118E-08 |
| 3-3      | 7463.83      | 0.376418    | 1.0172E-08 |
| 4-0      | 10191.61     | 0.958324    | 1.3889E-08 |
| 4-1      | 9487.81      | 0.773182    | 1.2930E-08 |
| 4-2      | 8789.04      | 0.614622    | 1.1978E-08 |
| 4-3      | 8094.81      | 0.480179    | 1.1032E-08 |
| 4-4      | 7405.11      | 0.367603    | 1.0092E-08 |
| 5-0      | 10818.75     | 1.146344    | 1.4744E-08 |
| 5-1      | 10114.95     | 1.146344    | 1.3785E-08 |
| 5-2      | 9416.18      | 0.936860    | 1.2832E-08 |
| 5-3      | 8721.94      | 0.755802    | 1.1886E-08 |
| 5-4      | 8032.25      | 0.600653    | 1.0946E-08 |
| 5-5      | 7348.49      | 0.469133    | 1.0014E-08 |
| 6-0      | 11439.27     | 0.359235    | 1.5589E-08 |
| 6-1      | 10735.46     | 1.120074    | 1.4630E-08 |
| 6-2      | 10036.70     | 0.915285    | 1.3678E-08 |
| 6-3      | 9342.46      | 0.738190    | 1.2732E-08 |
| 6-4      | 8652.77      | 0.586475    | 1.1792E-08 |
| 6-5      | 7969.01      | 0.458139    | 1.0860E-08 |
| 6-6      | 7292.73      | 0.351119    | 9.9385E-09 |
| 7-0      | 12052.70     | 1.585029    | 1.6425E-08 |
| 7-1      | 11348.90     | 1.323261    | 1.5466E-08 |
| 7-2      | 10650.13     | 1.093576    | 1.4514E-08 |
| 7-3      | 9955.90      | 0.893357    | 1.3568E-08 |
| 7-4      | 9266.21      | 0.720261    | 1.2628E-08 |
| 7-5      | 8582.45      | 0.572291    | 1.1696E-08 |
| 7-6      | 7906.16      | 0.447385    | 1.0774E-08 |
| 7-7      | 7236.98      | 0.343129    | 9.8625E-09 |
| 8-0      | 12656.75     | 1.835483    | 1.7248E-08 |
| 8-1      | 11952.95     | 1.545998    | 1.6289E-08 |
| 8-2      | 11254.18     | 1.290403    | 1.5337E-08 |

---

|     |          |          |            |
|-----|----------|----------|------------|
| 8-3 | 10559.94 | 1.066028 | 1.4391E-08 |
| 8-4 | 9870.25  | 0.870500 | 1.3451E-08 |
| 8-5 | 9186.49  | 0.701832 | 1.2519E-08 |
| 8-6 | 8510.21  | 0.557962 | 1.1598E-08 |
| 8-7 | 7841.03  | 0.436419 | 1.0686E-08 |
| 8-8 | 7177.36  | 0.334718 | 9.7812E-09 |
| 9-0 | 13251.97 | 2.106812 | 1.8060E-08 |
| 9-1 | 12548.17 | 1.788650 | 1.7101E-08 |
| 9-2 | 11849.40 | 1.506169 | 1.6148E-08 |
| 9-3 | 11155.17 | 1.256645 | 1.5202E-08 |
| 9-4 | 10465.48 | 1.037675 | 1.4262E-08 |
| 9-5 | 9781.72  | 0.847285 | 1.3330E-08 |
| 9-6 | 9105.43  | 0.683417 | 1.2409E-08 |
| 9-7 | 8436.26  | 0.543542 | 1.1497E-08 |
| 9-8 | 7772.59  | 0.425091 | 1.0592E-08 |
| 9-9 | 7113.89  | 0.325916 | 9.6947E-09 |

---

Table S5. The theoretically inferred energy, Einstein coefficient and oscillator strength of the experimentally observable  $a$ - $X_{Ms=\pm 1}$  band

| $v'-v''$ | $E(cm^{-1})$ | $A(s^{-1})$ | $f(a.u.)$  |
|----------|--------------|-------------|------------|
| 0-0      | 4197.02      | 0.001386    | 1.1848E-10 |
| 1-0      | 4877.78      | 0.002176    | 1.3770E-10 |
| 2-0      | 5546.69      | 0.003200    | 1.5658E-10 |
| 2-1      | 4842.89      | 0.002130    | 1.3672E-10 |
| 3-0      | 6214.53      | 0.004501    | 1.7544E-10 |
| 3-1      | 5510.73      | 0.003138    | 1.5557E-10 |
| 3-2      | 4811.96      | 0.002089    | 1.3584E-10 |
| 4-0      | 6875.18      | 0.006094    | 1.9409E-10 |
| 4-1      | 6171.38      | 0.004408    | 1.7422E-10 |
| 4-2      | 5472.61      | 0.003074    | 1.5449E-10 |
| 4-3      | 4778.38      | 0.002046    | 1.3489E-10 |
| 5-0      | 7532.69      | 0.008015    | 2.1265E-10 |
| 5-1      | 6828.89      | 0.005972    | 1.9278E-10 |
| 5-2      | 6130.12      | 0.004320    | 1.7305E-10 |
| 5-3      | 5435.88      | 0.003012    | 1.5346E-10 |
| 5-4      | 4746.19      | 0.002005    | 1.3399E-10 |
| 6-0      | 8183.05      | 0.010276    | 2.3101E-10 |
| 6-1      | 7479.25      | 0.007846    | 2.1114E-10 |
| 6-2      | 6780.48      | 0.005846    | 1.9141E-10 |
| 6-3      | 6086.25      | 0.004228    | 1.7182E-10 |
| 6-4      | 5396.55      | 0.002947    | 1.5235E-10 |
| 6-5      | 4712.79      | 0.001963    | 1.3304E-10 |
| 7-0      | 8824.37      | 0.012886    | 2.4911E-10 |
| 7-1      | 8120.57      | 0.010042    | 2.2925E-10 |
| 7-2      | 7421.80      | 0.007666    | 2.0952E-10 |
| 7-3      | 6727.57      | 0.005710    | 1.8992E-10 |
| 7-4      | 6037.88      | 0.004128    | 1.7045E-10 |
| 7-5      | 5354.12      | 0.002878    | 1.5115E-10 |
| 7-6      | 4677.83      | 0.001920    | 1.3206E-10 |
| 8-0      | 9458.05      | 0.015866    | 2.6700E-10 |
| 8-1      | 8754.25      | 0.012581    | 2.4713E-10 |
| 8-2      | 8055.48      | 0.009803    | 2.2741E-10 |
| 8-3      | 7361.25      | 0.007480    | 2.0781E-10 |
| 8-4      | 6671.55      | 0.005569    | 1.8834E-10 |
| 8-5      | 5987.79      | 0.004026    | 1.6904E-10 |
| 8-6      | 5311.51      | 0.002810    | 1.4994E-10 |
| 8-7      | 4642.33      | 0.001876    | 1.3105E-10 |
| 9-0      | 10085.55     | 0.019238    | 2.8472E-10 |
| 9-1      | 9381.75      | 0.015485    | 2.6485E-10 |
| 9-2      | 8682.98      | 0.012276    | 2.4512E-10 |

---

|     |         |          |            |
|-----|---------|----------|------------|
| 9-3 | 7988.74 | 0.009561 | 2.2552E-10 |
| 9-4 | 7299.05 | 0.007292 | 2.0605E-10 |
| 9-5 | 6615.29 | 0.005429 | 1.8675E-10 |
| 9-6 | 5939.01 | 0.003928 | 1.6766E-10 |
| 9-7 | 5269.83 | 0.002744 | 1.4877E-10 |
| 9-8 | 4606.16 | 0.001833 | 1.3003E-10 |

---
